# Supplementary material for: Individualized Perioperative Hemodynamic Management Using Hypotension Prediction Index Software and the Dynamics of Troponin and NTproBNP Concentration Changes in Patients Undergoing Oncological Abdominal Surgery
Source: MDPI journal article supplement (doi:10.3390/jpm14020211), 2024-02-16
Supplement: s1 [file s1]

# Supplementary material

Supplementary Table S1. The changes in NTproBNP levels over a 48-hour period post-surgery and the co-occurrence of chronic diseases.

|           | Specific comorbidity - YES |            |            | Specific Comorbidity-NO |            |            |          |          |          |
|-----------|----------------------------|------------|------------|-------------------------|------------|------------|----------|----------|----------|
| Variable  | Mean rank                  | <i>Mdn</i> | <i>IQR</i> | Mean rank               | <i>Mdn</i> | <i>IQR</i> | <i>Z</i> | <i>p</i> | <i>r</i> |
| NT        |                            |            |            |                         |            |            |          |          |          |
| Δ NT 2-0  | 24,36                      | 38,25      | 361,52     | 23,13                   | 87,25      | 142,32     | -0,29    | 0,775    | 0,04     |
| %Δ NT 2-0 | 27,64                      | 239,75     | 281,56     | 21,69                   | 150,18     | 131,83     | -1,38    | 0,166    | 0,20     |
| CHNS      |                            |            |            |                         |            |            |          |          |          |
| Δ NT 2-0  | 21,93                      | 38,25      | 135,60     | 26,44                   | 109,70     | 562,82     | -1,08    | 0,278    | 0,16     |
| %Δ NT 2-0 | 23,73                      | 171,42     | 189,38     | 23,06                   | 159,60     | 264,95     | -0,16    | 0,872    | 0,02     |
| Asthma    |                            |            |            |                         |            |            |          |          |          |
| Δ NT 2-0  | 23,05                      | 44,80      | 241,50     | 30,00                   | 84,40      | 44,30      | -0,87    | 0,386    | 0,13     |
| %Δ NT 2-0 | 23,23                      | 164,85     | 181,30     | 27,33                   | 175,66     | 39,14      | -0,51    | 0,609    | 0,08     |
| Cukrzyca  |                            |            |            |                         |            |            |          |          |          |
| Δ NT 2-0  | 22,35                      | 39,50      | 136,50     | 25,87                   | 84,40      | 274,60     | -0,83    | 0,405    | 0,12     |
| %Δ NT 2-0 | 23,84                      | 167,18     | 272,41     | 22,80                   | 164,85     | 143,00     | -0,25    | 0,806    | 0,04     |
| Miażdżyc  |                            |            |            |                         |            |            |          |          |          |
| Δ NT 2-0  | 20,67                      | 22,30      | 137,80     | 27,53                   | 107,40     | 242,60     | -1,71    | 0,088    | 0,25     |
| %Δ NT 2-0 | 23,63                      | 187,64     | 240,12     | 23,32                   | 164,85     | 159,06     | -0,08    | 0,938    | 0,01     |
| Otyłość   |                            |            |            |                         |            |            |          |          |          |
| Δ NT 2-0  | 23,81                      | 39,50      | 475,50     | 22,87                   | 90,10      | 128,90     | -0,22    | 0,824    | 0,03     |
| %Δ NT 2-0 | 24,23                      | 186,05     | 272,41     | 22,00                   | 154,35     | 119,50     | -0,53    | 0,598    | 0,08     |
| PNS       |                            |            |            |                         |            |            |          |          |          |
| Δ NT 2-0  | 22,68                      | 37,00      | 192,60     | 24,48                   | 90,10      | 290,35     | -0,45    | 0,651    | 0,07     |
| %Δ NT 2-0 | 25,60                      | 226,99     | 269,58     | 21,00                   | 153,10     | 145,86     | -1,16    | 0,247    | 0,17     |
| PNN       |                            |            |            |                         |            |            |          |          |          |
| Δ NT 2-0  | 24,81                      | 69,10      | 304,62     | 18,80                   | 62,25      | 730,70     | -1,25    | 0,211    | 0,18     |
| %Δ NT 2-0 | 25,47                      | 186,85     | 268,31     | 16,40                   | 133,40     | 134,37     | -1,89    | 0,059    | 0,28     |

Abbreviations : ΔNT-pro-BNP 2-0: Change in NT-pro-BNP concentration between the second day and the preoperative measurement,  
 %ΔNT-pro-BNP 2-0: Percentage change in NT-pro-BNP concentration between the second day and the preoperative measurement.

Supplementary Table S2. Correlations between the change in NT-proBNP between the preoperative level and the second day post-operation, and the proportions between these levels and age.

|                        | $\Delta$ NT-pro-BNP 2-0 |              | % $\Delta$ NT-pro-BNP 2-0: |       |
|------------------------|-------------------------|--------------|----------------------------|-------|
|                        | $r_s$                   | $p$          | $r_s$                      | $p$   |
| ASA                    | 0,16                    | 0,283        | -0,16                      | 0,294 |
| wiek                   | <b>0,38</b>             | <b>0,008</b> | 0,22                       | 0,140 |
| POSSUM - fizjologiczne | 0,02                    | 0,919        | -0,19                      | 0,204 |
| POSSUM - chirurgiczne  | -0,21                   | 0,156        | -0,08                      | 0,582 |
| POSSUM - chorobowość   | -0,12                   | 0,417        | -0,20                      | 0,193 |
| POSSUM - śmiertelność  | -0,13                   | 0,378        | -0,20                      | 0,175 |
| troponina              | 0,21                    | 0,167        | -0,03                      | 0,855 |

Supplementary Table S3. Comparison of hypotension parameters depending on the baseline troponin level

| Variable                                              | Troponin                |        |       |                                                           |        |        |       |       |      |
|-------------------------------------------------------|-------------------------|--------|-------|-----------------------------------------------------------|--------|--------|-------|-------|------|
|                                                       | No elevated<br>(n = 27) |        |       | Above 99 <sup>th</sup> percentile of lab norm<br>(n = 18) |        |        | Z     | p     | r    |
|                                                       | średnia ranga           | Mdn    | IQR   | średnia ranga                                             | Mdn    | IQR    |       |       |      |
| Total duration of monitoring (min)                    | 23,61                   | 265,00 | 97,00 | 22,08                                                     | 258,50 | 232,75 | -0,38 | 0,702 | 0,06 |
| Number of episodes with HPI >85                       | 21,39                   | 9,00   | 10,00 | 25,42                                                     | 14,00  | 13,00  | -1,01 | 0,313 | 0,15 |
| The number of hypotension episodes                    | 20,39                   | 1,00   | 2,00  | 26,92                                                     | 2,00   | 3,50   | -1,67 | 0,095 | 0,25 |
| Total duration of hypotension episodes, minutes       | 20,94                   | 3,00   | 6,00  | 26,08                                                     | 5,00   | 7,75   | -1,29 | 0,196 | 0,19 |
| The proportion of time spent in hypotension, %        | 20,48                   | 0,84   | 1,81  | 26,78                                                     | 1,85   | 3,04   | -1,58 | 0,114 | 0,24 |
| Average duration of each hypotension episode, minutes | 21,70                   | 2,00   | 2,00  | 24,94                                                     | 1,95   | 1,60   | -0,81 | 0,416 | 0,12 |
| Mean MAP if < 65mmHg                                  | 19,69                   | 60,14  | 3,27  | 19,26                                                     | 60,00  | 3,44   | -0,12 | 0,907 | 0,02 |
| AUT < 65mmHg                                          | 21,28                   | 22,67  | 58,67 | 25,58                                                     | 28,17  | 58,84  | -1,08 | 0,280 | 0,16 |
| TWA MAP < 65mmHg                                      | 20,80                   | 0,07   | 0,15  | 26,31                                                     | 0,12   | 0,27   | -1,38 | 0,167 | 0,21 |
| Number of episodes with MAP<50mmHg                    | 22,70                   | 0,00   | 0,00  | 23,44                                                     | 0,00   | 0,00   | -0,29 | 0,769 | 0,04 |

Supplementary table S4. Comparison of NT-proBNP parameters depending on meeting the PMI criterion.

| Variable                | PMI         |        |        |             |         |         | Z     | p     | r    |
|-------------------------|-------------|--------|--------|-------------|---------|---------|-------|-------|------|
|                         | No (n = 41) |        |        | YES (n = 5) |         |         |       |       |      |
|                         | Mean rank   | Mdn    | IQR    | Mean rank   | Mdn     | IQR     |       |       |      |
| NTproBNP – preoperative | 22,93       | 182,90 | 394,10 | 28,20       | 456,00  | 1651,85 | -0,83 | 0,407 | 0,12 |
| NTproBNP – 24 hours     | 22,80       | 273,00 | 412,85 | 29,20       | 1381,00 | 3136,75 | -1,01 | 0,315 | 0,15 |
| NTproBNP – 48 hours     | 23,10       | 271,00 | 537,10 | 26,80       | 1204,00 | 9359,25 | -0,58 | 0,560 | 0,09 |

Supplementary table S5. Comparison of NT-proBNP parameters depending on the occurrence of AKI.

| Zmienna zależna         | AKI         |        |        |              |         |         | Z     | p            | r    |
|-------------------------|-------------|--------|--------|--------------|---------|---------|-------|--------------|------|
|                         | NO (n = 35) |        |        | YES (n = 11) |         |         |       |              |      |
|                         | Mean Rank   | Mdn    | IQR    | Mean Rank    | Mdn     | IQR     |       |              |      |
| NTproBNP – preoperative | 21,17       | 111,40 | 294,00 | 30,91        | 435,90  | 926,60  | -2,10 | <b>0,036</b> | 0,31 |
| NTproBNP – 24 hours     | 21,69       | 209,70 | 376,70 | 29,27        | 400,50  | 1211,20 | -1,64 | 0,102        | 0,24 |
| NTproBNP – 48 hours     | 22,54       | 271,00 | 559,20 | 26,55        | 315,50  | 1021,00 | -0,86 | 0,388        | 0,13 |
| Δ NT 1-0                | 24,93       | 92,60  | 168,80 | 18,95        | 30,20   | 348,60  | -1,29 | 0,198        | 0,19 |
| Δ NT 2-0                | 25,94       | 99,40  | 323,60 | 15,73        | 20,70   | 325,10  | -2,20 | <b>0,028</b> | 0,32 |
| Δ NT 2-1                | 26,71       | -10,40 | 205,70 | 13,27        | -177,00 | 337,50  | -2,90 | <b>0,004</b> | 0,43 |
| %Δ NT 1-0               | 25,97       | 181,49 | 201,07 | 15,64        | 125,93  | 172,64  | -2,23 | <b>0,026</b> | 0,33 |
| %Δ NT 2-0               | 26,60       | 228,47 | 252,77 | 13,64        | 107,65  | 115,35  | -2,79 | <b>0,005</b> | 0,41 |
| %Δ NT 2-1               | 24,94       | 90,40  | 76,12  | 18,91        | 74,57   | 21,70   | -1,30 | 0,193        | 0,19 |

ΔNT-pro-BNP 1-0: Change in NT-pro-BNP concentration between the first day and the preoperative measurement. ΔNT-pro-BNP 2-0: Change in NT-pro-BNP concentration between the second day and the preoperative measurement. ΔNT-pro-BNP 2-1: Change in NT-pro-BNP concentration between the second day and the first day. %ΔNT-pro-BNP 1-0: Percentage change in NT-pro-BNP concentration between the first day and the preoperative measurement. %ΔNT-pro-BNP 2-0: Percentage change in NT-pro-BNP concentration between the second day and the preoperative measurement. %ΔNT-pro-BNP 2-1: Percentage change in NT-pro-BNP concentration between the second day and the first day.

Supplementary table S6. Frequency analysis along with Fisher's exact test for the relationship between the type of surgery and the occurrence of hypotension, PMI, AKI.

|                            |     | Type of Surgery |      |              |      | p     | φ/V  |
|----------------------------|-----|-----------------|------|--------------|------|-------|------|
|                            |     | Open            |      | Laparoscopic |      |       |      |
|                            |     | n               | %    | n            | %    |       |      |
| Intraoperative Hypotension | No  | 4               | 14,3 | 3            | 17,6 | 1,000 | 0,04 |
|                            | Yes | 24              | 85,7 | 14           | 82,4 |       |      |
| PMI                        | No  | 26              | 92,9 | 14           | 82,4 | 0,350 | 0,16 |
|                            | Yes | 2               | 7,1  | 3            | 17,6 |       |      |
| AKI                        | No  | 21              | 75,0 | 13           | 76,5 | 1,000 | 0,02 |
|                            | Yes | 7               | 25,0 | 4            | 23,5 |       |      |
